# Supplementary material
Source: PubMed Central journal article supplement (PMC8991397)

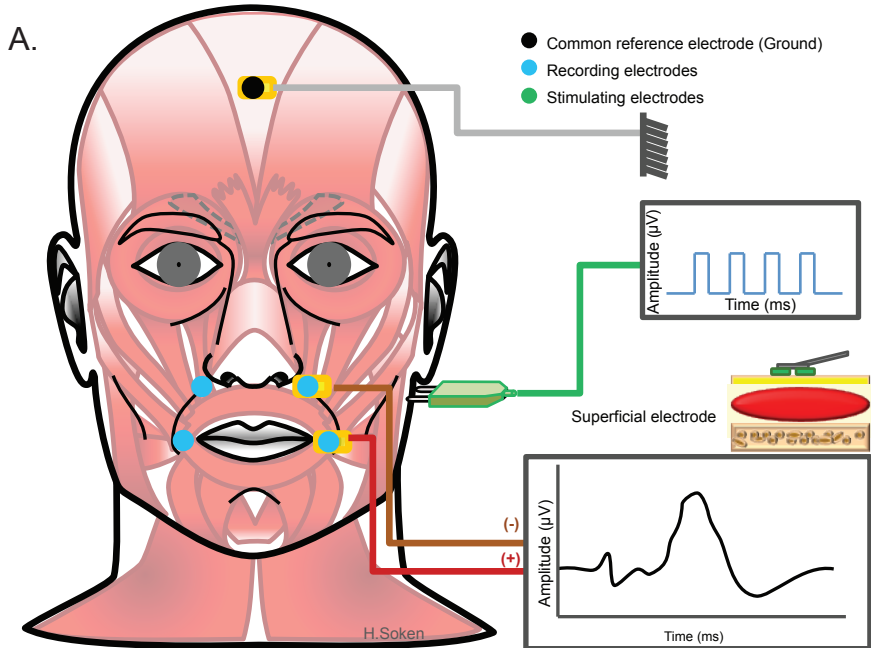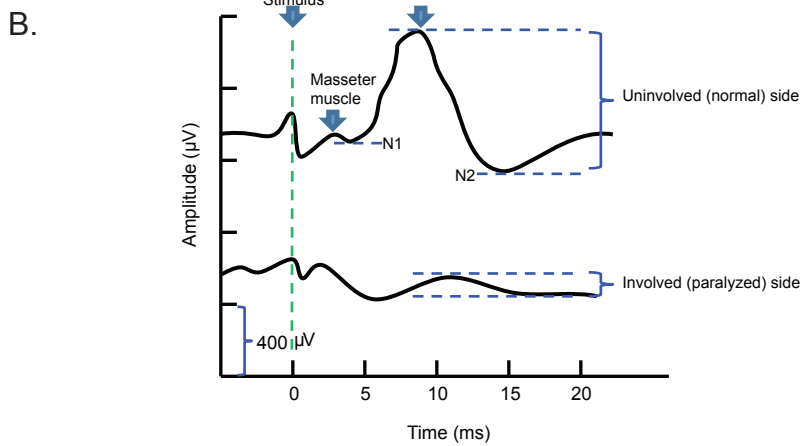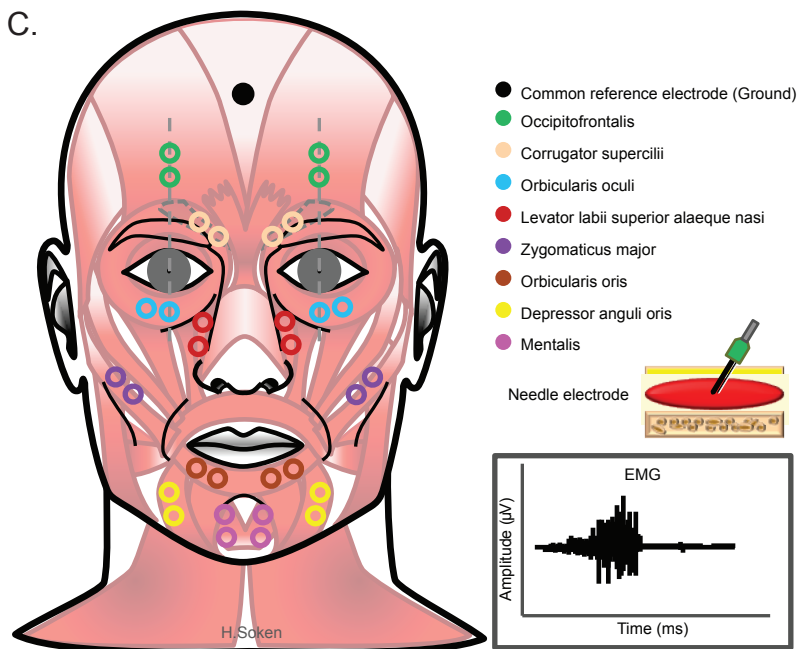

Supplement: NIHMS1641168-supplement-supplemental_Figure_1.pdf [file NIHMS1641168-supplement-supplemental_Figure_1.pdf]
